# Supplementary material for: Biliary Metabolome Profiling for Evaluation of Liver Metabolism and Biliary Tract Function Related to Organ Preservation Method and Degree of Ischemia in a Porcine Model
Source: MDPI journal article supplement (doi:10.3390/ijms24032127), 2023-01-21
Supplement: s1 [file s1]

# **Biliary Metabolome Profiling for Evaluation of Liver Metabolism and Biliary Tract Function Related to Organ Preservation Method and Degree of Ischemia in a Porcine Model**

**Kamil Łuczykowski <sup>1</sup>, Natalia Warmuzińska <sup>1</sup>, Dagmar Kollmann <sup>2,3</sup>, Markus Selzner <sup>2</sup>,  
Barbara Bojko <sup>1,\*</sup>**

<sup>1</sup> Department of Pharmacodynamics and Molecular Pharmacology, Faculty of Pharmacy, Nicolaus Copernicus University in Toruń, Collegium Medicum in Bydgoszcz, Bydgoszcz, Poland

<sup>2</sup> Department of Surgery, Ajmera Transplant Centre, Toronto General Hospital, University Health Network, Toronto, Canada

<sup>3</sup> Department of General Surgery, Medical University of Vienna, Vienna, Austria

\* Correspondence: bbojko@cm.umk.pl

## **Supplementary Material**

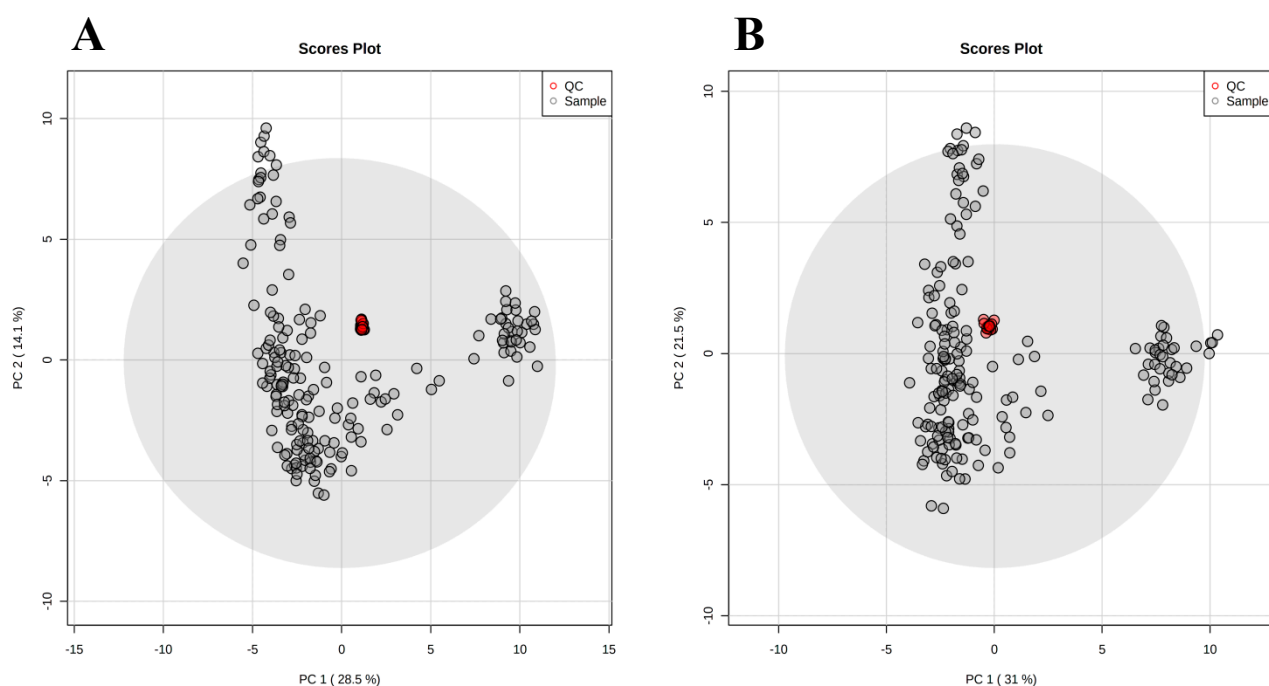

**Figure S1. Principal component analysis (PCA) plots of all analyzed samples and extraction quality control (QC) samples for positive ionization mode (A) and negative ionization mode (B)**

**Table S1. The list of statistically significant compounds in comparison HBD versus 30'DCD for SCS and NEVLP donors in particular time points. Data for positive ionization mode.**

| Name                                     | Molecular weight | RT    | Effect of 30-minute ischemia (HBD vs 30'DCD) |              |                    |               |               |              |
|------------------------------------------|------------------|-------|----------------------------------------------|--------------|--------------------|---------------|---------------|--------------|
|                                          |                  |       | Baseline (n=5)                               |              | Reperfusion (n=10) |               | POD (n=10)    |              |
|                                          |                  |       | HBD SCS                                      | HBD NEVLP    | HBD SCS            | HBD NEVLP     | HBD SCS       | HBD NEVLP    |
|                                          |                  |       | 30'DCD SCS                                   | 30'DCD NEVLP | 30'DCD SCS         | 30'DCD NEVLP  | 30'DCD SCS    | 30'DCD NEVLP |
|                                          |                  |       | FC                                           | FC           | FC                 | FC            | FC            | FC           |
| Indole                                   | 117.06           | 13.82 | -1.25                                        | -1.32        | <b>-1.89**</b>     | 1.02          | -1.12         | 1.04         |
| 5-amino-pentanoic acid                   | 117.08           | 1.63  | -1.25                                        | -1.49        | <b>-2.08**</b>     | 1.05          | -1.19         | -1.69        |
| 4-Methylene-2-pyrrolidinecarboxylic acid | 127.06           | 7.26  | <b>-3.45*</b>                                | -1.25        | -1.41              | -1.23         | -3.23         | -1.05        |
| Pyroglutamic acid                        | 129.04           | 1.50  | -2.70                                        | 1.08         | <b>-2.22*</b>      | -1.11         | <b>-2.63*</b> | 1.06         |
| 1H-Indole-3-carboxaldehyde               | 145.05           | 11.26 | -1.11                                        | -1.28        | <b>-1.54*</b>      | 1.15          | -1.08         | -1.16        |
| Phenylalanine                            | 165.08           | 9.43  | -1.59                                        | -1.25        | <b>-1.64*</b>      | 1.00          | -1.52         | -2.22        |
| 2,5-Dichloro-4-oxohex-2-enedioate        | 225.94           | 1.96  | -1.19                                        | -1.39        | <b>-1.33*</b>      | 1.14          | -1.05         | -1.18        |
| Palmitamide                              | 255.26           | 20.25 | -1.25                                        | -1.79        | <b>-1.39*</b>      | -1.09         | -1.20         | -1.72        |
| Linoleamide                              | 279.26           | 19.88 | -1.08                                        | 1.01         | <b>-2.17*</b>      | -1.47         | -2.17         | -3.57        |
| Stearamide                               | 283.29           | 21.38 | -1.28                                        | -1.67        | <b>-1.47**</b>     | -1.02         | -1.30         | -1.85        |
| N-isobutyl-2,4-octadecadienoyl amine     | 335.32           | 21.89 | -1.39                                        | -1.64        | <b>-2.00*</b>      | -1.39         | -1.59         | -1.92        |
| Docosanamide                             | 339.35           | 23.35 | -1.39                                        | -1.69        | <b>-1.49*</b>      | -1.15         | -1.32         | -1.61        |
| Tetrahydrocorticosterone                 | 350.25           | 15.99 | 2.29                                         | 1.66         | <b>2.37*</b>       | 2.55          | -1.06         | 1.45         |
| 3-Oxo-4,6-choadienoic acid               | 370.25           | 16.08 | -7.69                                        | 1.95         | -2.17              | <b>-2.94*</b> | -1.96         | -1.10        |
| 12-Oxochenodeoxycholic acid              | 406.27           | 13.99 | -2.44                                        | -1.06        | <b>-3.33**</b>     | <b>-1.54*</b> | -1.75         | -1.09        |

|                           |        |       |       |       |                |              |               |              |
|---------------------------|--------|-------|-------|-------|----------------|--------------|---------------|--------------|
| N-Docosahexaenoyl GABA    | 413.29 | 13.82 | -1.3  | -1.32 | <b>-1.85**</b> | 1.08         | -1.04         | 1.03         |
| LPE 14:0                  | 425.26 | 13.98 | -1.85 | 1.36  | -1.79          | 1.19         | <b>-2.22*</b> | <b>2.14*</b> |
| Glycoursodeoxycholic acid | 449.31 | 13.44 | -1.23 | -1.18 | <b>-2.38**</b> | -1.28        | -1.22         | 1.02         |
| Glycocholic acid          | 465.31 | 13.20 | -1.08 | 1.19  | <b>-1.61*</b>  | 1.44         | -1.05         | -1.03        |
| Glycohyocholic acid       | 465.31 | 12.71 | 1.55  | 1.38  | <b>-2.44*</b>  | 1.86         | -1.27         | 1.21         |
| PE O-18:0                 | 481.32 | 18.62 | 2.11  | -2.04 | 1.03           | 1.07         | <b>4.36*</b>  | -1.75        |
| LPC 15:0                  | 481.32 | 17.18 | 1.75  | 1.10  | 1.47           | 1.19         | <b>3.41*</b>  | -1.85        |
| LPC 17:0                  | 509.35 | 18.29 | 2.29  | -1.03 | 1.60           | 1.37         | <b>5.50*</b>  | -1.89        |
| LPC 18:2                  | 519.33 | 17.29 | 1.52  | -1.10 | <b>1.76**</b>  | 1.81         | 1.77          | 1.29         |
| LPC 18:0                  | 523.37 | 18.84 | 1.72  | -1.16 | 1.27           | 1.08         | <b>3.34*</b>  | -2.08        |
| PC 32:2                   | 729.53 | 24.01 | 1.24  | 1.15  | -1.01          | <b>1.79*</b> | 1.52          | 1.58         |
| PC 32:1                   | 731.55 | 24.90 | 1.43  | -1.59 | -1.04          | <b>1.62*</b> | 1.39          | 1.31         |
| PE 36:4                   | 741.53 | 24.23 | -1.61 | 1.49  | <b>-1.82*</b>  | -1.01        | 1.07          | 1.98         |

- denotes an increased level in the group located in the denominator of the fraction; \*- p<0,05;  
 \*\* - p<0.01

**Table S2. The list of statistically significant compounds in comparison HBD versus 30'DCD for SCS and NEVLP donors in particular time points. Data for negative ionization mode.**

| Name                                                                     | Molecular weight | RT    | Effect of 30-minute ischemia (HBD vs 30'DCD) |              |                    |               |                |               |
|--------------------------------------------------------------------------|------------------|-------|----------------------------------------------|--------------|--------------------|---------------|----------------|---------------|
|                                                                          |                  |       | Baseline (n=5)                               |              | Reperfusion (n=10) |               | POD (n=10)     |               |
|                                                                          |                  |       | HBD SCS                                      | HBD NEVLP    | HBD SCS            | HBD NEVLP     | HBD SCS        | HBD NEVLP     |
|                                                                          |                  |       | 30'DCD SCS                                   | 30'DCD NEVLP | 30'DCD SCS         | 30'DCD NEVLP  | 30'DCD SCS     | 30'DCD NEVLP  |
|                                                                          |                  |       | FC                                           | FC           | FC                 | FC            | FC             | FC            |
| Glucuronic acid                                                          | 194.04           | 1.17  | <b>-3.03*</b>                                | 1.21         | -2.38              | -1.05         | -11.11         | 1.76          |
| 5-Methoxyindoleacetic acid                                               | 205.07           | 14.18 | <b>-2.7**</b>                                | 1.22         | -1.16              | -1.06         | -2.00          | 1.13          |
| Ribose-5-phosphate                                                       | 230.02           | 1.17  | <b>-2.86*</b>                                | 1.21         | -1.96              | -1.01         | -7.69          | 1.64          |
| Tridecanedioic acid                                                      | 244.17           | 15.26 | 1.01                                         | -1.89        | -1.32              | 1.08          | -1.01          | <b>-2.27*</b> |
| 5S-HETE                                                                  | 320.24           | 18.94 | <b>9.46*</b>                                 | -1.79        | 2.15               | -2.27         | 2.41           | -4.55         |
| N-Palmitoyl tyrosine                                                     | 419.30           | 15.97 | 6.28                                         | -1.20        | <b>5.00*</b>       | -3.13         | 5.74           | -4.00         |
| Cortisol 21-sulfate                                                      | 442.17           | 9.20  | -1.61                                        | -1.01        | <b>2.74*</b>       | -1.12         | -1.33          | -1.05         |
| Retinoyl b-glucuronide                                                   | 476.24           | 16.60 | 9.68                                         | -2.78        | 5.06               | -2.63         | -1.12          | <b>5.34*</b>  |
| 1-O-all-trans-retinoyl-beta-glucuronic acid                              | 476.24           | 16.94 | 4.43                                         | -1.30        | 4.70               | 1.12          | -2.22          | <b>6.94**</b> |
| alpha-Ionol O-[arabinosyl-(1->6)-glucoside]                              | 488.26           | 14.05 | 2.31                                         | 1.70         | <b>5.41*</b>       | 2.76          | -2.04          | 1.80          |
| 4-Hydroxyretinoic acid glucuronide                                       | 492.24           | 13.62 | 6.29                                         | -1.49        | 6.50               | <b>-3.45*</b> | -1.30          | 3.39          |
| N-[(3a.5b.7a.12a)-3.7-dihydroxy-24-oxo-12-(sulfoxy)cholan-24-yl]-Glycine | 545.27           | 10.62 | 1.08                                         | 1.48         | -2.17              | 1.28          | <b>-2.78**</b> | -1.20         |

- denotes an increased level in the group located in the denominator of the fraction; \*- p<0.05;  
 \*\* - p<0.01

**Table S3. Detailed data of linear correlation coefficients and significance levels for metabolite correlated with organ ischemia.**

| Name                            | Molecular Weight | RT [min] | Correlation | Raw p-value | FDR adjusted p-value |
|---------------------------------|------------------|----------|-------------|-------------|----------------------|
| <b>Positive ionization mode</b> |                  |          |             |             |                      |
| PE P-18:0                       | 481.32           | 18.62    | -0.80659    | 1.7404e-05  | 0.0013468            |
| LPC 18:3                        | 517.32           | 16.92    | -0.79883    | 2.405e-05   | 0.0013468            |
| LPC 17:1                        | 507.33           | 17.56    | -0.79883    | 2.405e-05   | 0.0013468            |
| LPE 18:2                        | 477.29           | 17.29    | -0.78332    | 4.4148e-05  | 0.0018542            |
| PE 20:1                         | 507.33           | 17.38    | -0.77557    | 5.8753e-05  | 0.0018563            |
| LPC 20:4                        | 543.33           | 17.56    | -0.76781    | 7.7345e-05  | 0.0018563            |
| LPC 22:6                        | 567.33           | 17.64    | -0.76781    | 7.7345e-05  | 0.0018563            |
| LPC 16:1                        | 493.32           | 17.00    | -0.76006    | 0.00010079  | 0.0021166            |
| LPC 16:0                        | 495.33           | 17.74    | -0.7523     | 0.0001301   | 0.0021857            |
| LPC 14:0                        | 467.30           | 16.60    | -0.7523     | 0.0001301   | 0.0021857            |
| LPC 18:0                        | 523.37           | 18.84    | -0.74454    | 0.00016644  | 0.002542             |
| LPC 18:1                        | 535.33           | 15.07    | -0.72903    | 0.00026575  | 0.003189             |
| LPC 18:2                        | 519.33           | 17.29    | -0.72903    | 0.00026575  | 0.003189             |
| LPC 15:0                        | 481.32           | 17.18    | -0.72903    | 0.00026575  | 0.003189             |
| Arachidonic acid                | 304.24           | 21.14    | -0.72128    | 0.00033198  | 0.0037181            |
| <b>Negative ionization mode</b> |                  |          |             |             |                      |
| 5S-HETE                         | 320.24           | 18.94    | -0.85617    | 1.4664e-06  | 0.00012171           |
| LPC 17:0                        | 509.35           | 18.86    | -0.82093    | 9.1997e-06  | 0.0002914            |
| LPE 18:2                        | 477,29           | 17.29    | -0.81799    | 1.0533e-05  | 0.0002914            |
| LPE 18:1                        | 479,30           | 17,91    | -0.80122    | 2.1807e-05  | 0.0004525            |
| LPC 17:1                        | 507.33           | 17.56    | -0.79525    | 2.7795e-05  | 0.00046139           |
| LPE 20:4                        | 501,29           | 17,39    | -0.73915    | 0.00019656  | 0.0027191            |
| 9,10,13-TriHOME                 | 330,24           | 13,64    | -0.7339     | 0.00023022  | 0.0027297            |

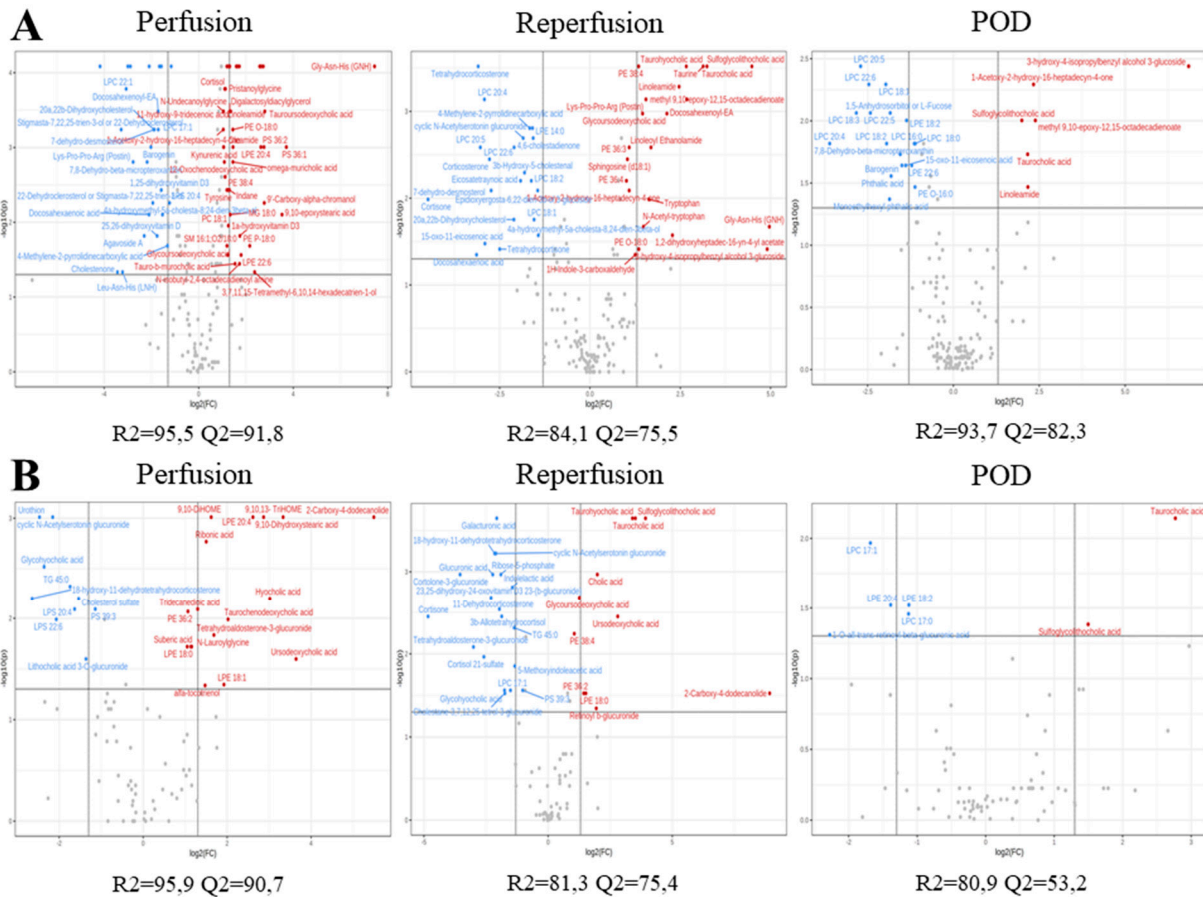

**Figure S2. Volcano plots showing the number of metabolites differentiating the 90'DCD group compared to the HBD group in particular time intervals (fold change >2.  $p < 0.05$  with FDR correction) for positive ionization mode (A) and negative ionization mode (B), red color - increased level after ischemia. blue color - decreased level after ischemia**
